# Supplementary material
Source: PubMed Central journal article supplement (PMC7803940)
Supplement: mmc1.pdf [file mmc1.pdf]

# United States Pulmonary Hypertension Scientific Registry

## Baseline Characteristics

*Jessica B. Badlam, MD; David B. Badesch, MD; Eric D. Austin, MD;  
Raymond L. Benza, MD; Wendy K. Chung, MD, PhD; Harrison W. Farber, MD;  
Kathy Feldkircher, PhD; Adaani E. Frost, MD; Abby D. Poms, RRT CCRP; Katie A. Lutz, BS;  
Michael W. Pauciulo, MBA; Chang Yu, PhD; William C. Nichols, PhD; and  
C. Gregory Elliott, MD; on behalf of USPHSR Investigators*

CHEST 2021; 159(1):311-327

*Online supplements are not copyedited prior to posting and the author(s) take full responsibility for the accuracy of all data.*

© 2020 AMERICAN COLLEGE OF CHEST PHYSICIANS. Reproduction of this article is prohibited without written permission from the American College of Chest Physicians. See online for more details. DOI: 10.1016/j.chest.2020.07.088

**e-Appendix 1.** List of USPHSR participating Pulmonary Hypertension centers, their location, institutional review board (IRB) committee name, and project approval number.

| Site Name                    | Location           | IRB Name                                                                                         | Number       | Type of Number     |
|------------------------------|--------------------|--------------------------------------------------------------------------------------------------|--------------|--------------------|
| University of Colorado       | Aurora, CO         | University Research, University of Colorado Denver, Colorado Multiple Institutional Review Board | PAM004-1     | Submission ID      |
| Allegheny General Hospital   | Pittsburgh, PA     | Allegheny Health Network Research Institute                                                      | RC-6270      | Not Applicable     |
| Mayo Clinic, Jacksonville    | Jacksonville, FL   | Mayo Clinic Institutional Review Board                                                           | 16007417     | Application Number |
| Washington University        | St. Louis, MO      | Washington University in St. Louis Human Research Protection Office                              | 201612118    | IRB ID Number      |
| University of Arizona        | Tucson, AZ         | The University of Arizona Human Subjects Protection Program                                      | 1710951702   | Protocol Number    |
| Intermountain Medical Center | Salt Lake City, UT | Intermountain Healthcare Research Institutional Review Board                                     | 1050403      | IRB Number         |
| University of Cincinnati     | Cincinnati, OH     | University of Cincinnati Institutional Review Board                                              | 2017-4874    | Study ID           |
| Boston University            | Boston, MA         | Boston Medical, Boston University, Office of the Institutional Review Board                      | H-35388      | IRB Number         |
| Duke University              | Durham, NC         | Duke Medicine Institutional Review Board for Clinical Investigations                             | Pro00074764  | Protocol ID        |
| Mayo Clinic, Rochester       | Rochester, MN      | Mayo Clinic Institutional Review Board                                                           | 16-006159    | Application Number |
| Tufts University             | Boston, MA         | Tufts Health Sciences, Health Sciences Campus Institutional Review Board                         | 12772        | IRB Number         |
| Vanderbilt University        | Nashville, TN      | Vanderbilt University Institutional Review Board                                                 | 170116       | IRB Number         |
| Houston Methodist Hospital   | Houston, TX        | Houston Methodist Institutional Review Board                                                     | Pro00015112  | Protocol ID        |
| University of Pittsburgh     | Pittsburgh, PA     | University of Pittsburgh Institutional Review Board                                              | PRO16110373  | IRB Number         |
| University of Rochester      | Rochester, NY      | University of Rochester Office for Human Subject Protection Research Subjects Review Board       | RSRB00063320 | RSRB               |

**e-Table 1. Comorbidities by WHO Group 1 and APAH sub-group at enrollment in PAH Biobank.**

| Comorbid Condition                     | All Patients | IPAH      | FPAH     | PVOD/PCH | APAH (all) | CTD        | CHD      | PoPH      | Drugs/toxins |
|----------------------------------------|--------------|-----------|----------|----------|------------|------------|----------|-----------|--------------|
| <b>N</b>                               | 499          | 218       | 22       | 3        | 256        | 171        | 30       | 22        | 24           |
| <b>Obesity</b>                         | 104 (20.8)   | 52 (23.9) | 5 (22.7) | 1 (33.3) | 46 (18)    | 29 (17)    | 3 (10)   | 5 (22.7)  | 5 (20.8)     |
| <b>Cancer (Non-Skin)</b>               | 21 (4.2)     | 11 (5)    | 0        | 0        | 10 (3.9)   | 8 (4.7)    | 0        | 0         | 2 (8.3)      |
| <b>Ischemic Cardiovascular Event</b>   | 43 (8.6)     | 10 (4.6)  | 2 (9.1)  | 0        | 31 (12.1)  | 20 (11.7)  | 3 (10)   | 4 (18.2)  | 3 (12.5)     |
| <b>Diabetes</b>                        | 75 (15)      | 29 (13.3) | 4 (18.2) | 0        | 42 (16.4)  | 27 (15.8)  | 1 (3.3)  | 7 (31.8)  | 6 (25)       |
| <b>Hypertension</b>                    | 185 (37.1)   | 82 (37.6) | 2 (9.1)  | 1 (33.3) | 100 (39.1) | 73 (42.7)  | 7 (23.3) | 7 (31.8)  | 11 (45.8)    |
| <b>Cardiomyopathy</b>                  | 9 (1.8)      | 5 (2.3)   | 0        | 0        | 4 (1.6)    | 2 (1.2)    | 0        | 0         | 2 (8.3)      |
| <b>Valvular Heart Disease</b>          | 25 (5)       | 9 (4.1)   | 0        | 0        | 16 (6.2)   | 9 (5.3)    | 4 (13.3) | 1 (4.5)   | 2 (8.3)      |
| <b>Scleroderma</b>                     | 115 (23)     | 2 (0.9)   | 0        | 0        | 113 (44.1) | 113 (66.1) | 0        | 0         | 0            |
| <b>Rheumatoid Arthritis</b>            | 24 (4.8)     | 1 (0.5)   | 0        | 0        | 23 (9.0)   | 20 (11.7)  | 1 (3.3)  | 1 (4.5)   | 1 (4.2)      |
| <b>Lupus</b>                           | 22 (4.4)     | 1 (0.5)   | 0        | 0        | 21 (8.2)   | 21 (12.3)  | 0        | 0         | 0            |
| <b>Other Collagen Vascular Disease</b> | 15 (3)       | 0         | 0        | 0        | 15 (5.9)   | 14 (8.2)   | 1 (3.3)  | 0         | 0            |
| <b>Deep Vein Thrombosis</b>            | 16 (3.2)     | 7 (3.2)   | 0        | 0        | 9 (3.5)    | 7 (4.1)    | 0        | 0         | 1 (4.2)      |
| <b>Pulmonary Embolism</b>              | 18 (3.6)     | 10 (4.6)  | 0        | 1 (33.3) | 7 (2.7)    | 5 (2.9)    | 2 (6.7)  | 0         | 0            |
| <b>Hypothyroidism</b>                  | 90 (18)      | 32 (14.7) | 5 (22.7) | 1 (33.3) | 52 (20.3)  | 45 (26.3)  | 1 (3.3)  | 2 (9.1)   | 3 (12.5)     |
| <b>Hyperthyroidism</b>                 | 12 (2.4)     | 4 (1.8)   | 1 (4.5)  | 0        | 7 (2.7)    | 7 (4.1)    | 0        | 0         | 0            |
| <b>Renal Insufficiency</b>             | 29 (5.8)     | 15 (6.9)  | 0        | 0        | 14 (5.5)   | 7 (4.1)    | 1 (3.3)  | 3 (13.6)  | 3 (12.5)     |
| <b>COPD</b>                            | 43 (8.6)     | 18 (8.3)  | 0        | 1 (33.3) | 24 (9.4)   | 11 (6.4)   | 5 (16.7) | 3 (13.6)  | 4 (16.7)     |
| <b>ILD/IPF</b>                         | 47 (9.4)     | 4 (1.8)   | 0        | 2 (66.7) | 41 (16)    | 41 (24)    | 0        | 0         | 0            |
| <b>Cirrhosis</b>                       | 29 (5.8)     | 2 (0.9)   | 0        | 0        | 27 (10.5)  | 3 (1.8)    | 1 (3.3)  | 20 (90.9) | 1 (4.2)      |
| <b>Clinical Depression</b>             | 57 (11.4)    | 26 (11.9) | 1 (4.5)  | 0        | 30 (11.7)  | 14 (8.2)   | 5 (16.7) | 4 (18.2)  | 4 (16.7)     |
| <b>Hyperlipidemia</b>                  | 48 (9.6)     | 20 (9.2)  | 0        | 0        | 28 (10.9)  | 22 (12.9)  | 2 (6.7)  | 1 (4.5)   | 3 (12.5)     |
| <b>Asthma</b>                          | 33 (6.6)     | 15 (6.9)  | 2 (9.1)  | 0        | 16 (6.2)   | 9 (5.3)    | 4 (13.3) | 1 (4.5)   | 1 (4.2)      |

Values presented as No. (%) unless otherwise noted  
 See Tables 1a and 1b for expansion of abbreviations  
 COPD – Chronic obstructive pulmonary disease  
 ILD/IPF – Interstitial lung disease/Idiopathic pulmonary fibrosis

**e-Table 2.** Concomitant medications by WHO Group 1 and APAH subgroup at enrollment in PAH Biobank.

| Concomitant medications              | All Patients | IPAH       | FPAH      | PVOD/<br>PCH | APAH (all) | APAH sub-groups |           |           |                  |
|--------------------------------------|--------------|------------|-----------|--------------|------------|-----------------|-----------|-----------|------------------|
|                                      |              |            |           |              |            | CTD             | CHD       | PoPH      | Drugs/<br>toxins |
| <b>N</b>                             | 499          | 218        | 22        | 3            | 256        | 171             | 30        | 22        | 24               |
| <b>Warfarin</b>                      | 97 (19.4)    | 63 (28.9)  | 8 (36.4)  | 0            | 26 (10.2)  | 21 (12.3)       | 2 (6.7)   | 0         | 3 (12.5)         |
| <b>CCB</b>                           | 67 (13.4)    | 23 (10.6)  | 0         | 1 (33.3)     | 43 (16.8)  | 36 (21.1)       | 2 (6.7)   | 2 (9.1)   | 3 (12.5)         |
| <b>Long-acting nitrate</b>           | 2 (0.4)      | 0          | 0         | 0            | 2 (0.8)    | 2 (1.2)         | 0         | 0         | 0                |
| <b>ACE Inhibitor</b>                 | 51 (10.2)    | 21 (9.6)   | 0         | 0            | 30 (11.7)  | 21 (12.3)       | 2 (6.7)   | 1 (4.5)   | 5 (20.8)         |
| <b>Beta Blocker</b>                  | 97 (19.4)    | 44 (20.2)  | 2 (9.1)   | 0            | 51 (19.9)  | 31 (18.1)       | 9 (30)    | 7 (31.8)  | 3 (12.5)         |
| <b>Heparin</b>                       | 2 (0.4)      | 1 (0.5)    | 0         | 0            | 1 (0.4)    | 1 (0.6)         | 0         | 0         | 0                |
| <b>Low molecular weight heparin</b>  | 3 (0.6)      | 1 (0.5)    | 0         | 0            | 2 (0.8)    | 1 (0.6)         | 0         | 1 (4.5)   | 0                |
| <b>Direct oral anticoagulant</b>     | 19 (3.8)     | 6 (2.8)    | 0         | 2 (66.7)     | 11 (4.3)   | 8 (4.7)         | 3 (10)    | 0         | 0                |
| <b>Corticosteroid</b>                | 91 (18.2)    | 22 (10.1)  | 3 (13.6)  | 0            | 66 (25.8)  | 58 (33.9)       | 2 (6.7)   | 4 (18.2)  | 1 (4.2)          |
| <b>Aspirin</b>                       | 141 (28.3)   | 53 (24.3)  | 3 (13.6)  | 0            | 85 (33.2)  | 69 (40.4)       | 5 (16.7)  | 5 (22.7)  | 5 (20.8)         |
| <b>Other Anti Inflammatory</b>       | 41 (8.2)     | 16 (7.3)   | 2 (9.1)   | 0            | 23 (9)     | 11 (6.4)        | 4 (13.3)  | 1 (4.5)   | 5 (20.8)         |
| <b>NSAID</b>                         | 51 (10.2)    | 20 (9.2)   | 1 (4.5)   | 0            | 30 (11.7)  | 18 (10.5)       | 3 (10)    | 1 (4.5)   | 5 (20.8)         |
| <b>Monoclonal Antibodies</b>         | 1 (0.2)      | 0          | 0         | 0            | 1 (0.4)    | 0               | 1 (3.3)   | 0         | 0                |
| <b>Clopidogrel</b>                   | 11 (2.2)     | 5 (2.3)    | 0         | 0            | 6 (2.3)    | 5 (2.9)         | 1 (3.3)   | 0         | 0                |
| <b>Diuretic</b>                      | 352 (70.5)   | 153 (70.2) | 15 (68.2) | 2 (66.7)     | 182 (71.1) | 123 (71.9)      | 16 (53.5) | 19 (86.4) | 21 (87.5)        |
| <b>Oxygen</b>                        | 169 (33.9)   | 71 (32.6)  | 3 (13.6)  | 2 (66.7)     | 93 (36.3)  | 62 (36.3)       | 13 (43.3) | 5 (22.7)  | 8 (33.3)         |
| <b>Digoxin</b>                       | 59 (11.8)    | 25 (11.5)  | 5 (22.7)  | 0            | 29 (11.3)  | 23 (13.5)       | 2 (6.7)   | 1 (4.5)   | 3 (4.3)          |
| <b>Statin</b>                        | 122 (24.4)   | 59 (27.1)  | 1 (4.5)   | 0            | 62 (24.2)  | 51 (29.8)       | 3 (10)    | 3 (13.6)  | 4 (16.7)         |
| <b>SSRI</b>                          | 111 (22.2)   | 44 (20.2)  | 4 (18.2)  | 0            | 63 (24.6)  | 44 (25.7)       | 5 (16.7)  | 5 (22.7)  | 7 (29.2)         |
| <b>Synthetic Thyroid</b>             | 102 (21)     | 36 (16.5)  | 4 (18.2)  | 1 (33.3)     | 64 (25)    | 55 (32.2)       | 2 (6.7)   | 2 (9.1)   | 3 (12.5)         |
| <b>Psychotropic drugs</b>            | 55 (11)      | 24 (11.0)  | 4 (18.2)  | 2 (66.7)     | 25 (9.8)   | 14 (8.2)        | 8 (26.7)  | 1 (4.5)   | 2 (8.3)          |
| <b>Other Antidepressants</b>         | 45 (9)       | 19 (8.7)   | 0         | 0            | 26 (10.2)  | 18 (10.5)       | 5 (16.7)  | 1 (4.5)   | 1 (4.2)          |
| <b>Immunosuppressive medications</b> | 73 (14.6)    | 6 (2.8)    | 0         | 1 (33.3)     | 66 (25.8)  | 59 (34.5)       | 2 (6.7)   | 5 (22.7)  | 0                |
| <b>Angiotensin receptor blockers</b> | 28 (5.6)     | 12 (5.5)   | 1 (4.5)   | 0            | 15 (5.9)   | 13 (7.6)        | 2 (6.7)   | 0         | 0                |
| <b>Potassium</b>                     | 114 (22.8)   | 52 (23.9)  | 7 (31.8)  | 1 (33.3)     | 54 (21.1)  | 40 (23.4)       | 4 (13.3)  | 3 (13.6)  | 6 (25)           |
| <b>Diabetes Medications</b>          | 60 (12)      | 27 (12.4)  | 2 (9.1)   | 0            | 31 (12.1)  | 19 (11.1)       | 1 (3.3)   | 5 (22.7)  | 5 (20.8)         |
| <b>Other non-PH drug</b>             | 339 (67.9)   | 149 (68.3) | 13 (59.1) | 3 (100)      | 174 (68)   | 121 (70.8)      | 18 (60)   | 17 (77.3) | 13 (54.2)        |
| <b>None</b>                          | 12 (2.4)     | 8 (3.7)    | 1 (4.5)   | 0            | 3 (1.2)    | 0               | 1 (3.3)   | 1 (4.5)   | 0                |

Values presented as No. (%) unless otherwise noted

SSRI – selective serotonin reuptake inhibitor

NSAID – non-steroidal anti-inflammatory drug

CCB – calcium channel blocker

ACE – angiotensin converting enzyme See Tables 1a and 1b for expansion of abbreviations

**e-Table 3.** Environmental exposures in all USPHSR subjects (male and female) by WHO Group 1, includes anorexigens, soy, well water, and cigarette smoking.

| Exposure                                         | All Patients | IPAH        | FPAH      | PVOD/PCH  | APAH (all-subgroups) |
|--------------------------------------------------|--------------|-------------|-----------|-----------|----------------------|
| <b>Patients, N</b>                               | 494          | 213         | 22        | 3         | 256                  |
| <b>Ever taken Fen-Phen or Phentermine, N (%)</b> | 55 (11.4)    | 21 (10.1)   | 2 (9.1)   | 1 (33.3)  | 31 (12.5)            |
| <b>Ever taken other weight loss drugs, N (%)</b> | 84 (17.3)    | 39 (18.6)   | 4 (19)    | 0         | 41 (16.3)            |
| <b>Prescription, N (%)</b>                       | 24 (28.6)    | 9 (23.1)    | 1 (25)    | 0         | 14 (34.1)            |
| <b>Soy product consumption, N (%)</b>            | 98 (19.8)    | 39 (18.6)   | 4 (19)    | 1 (33.3)  | 53 (20.7)            |
| <b>Soy product consumption duration, N (%)</b>   |              |             |           |           |                      |
| <b>1 time per month</b>                          | 38 (38.8)    | 15 (37.5)   | 1 (25)    | 0         | 22 (41.5)            |
| <b>2 to 3 times per month</b>                    | 29 (29.6)    | 12 (30)     | 1 (25)    | 1 (100)   | 15 (28.3)            |
| <b>1 time per week</b>                           | 5 (5.1)      | 1 (2.5)     | 0         | 0         | 4 (7.5)              |
| <b>2 times per week</b>                          | 9 (9.2)      | 5 (12.5)    | 0         | 0         | 4 (7.5)              |
| <b>3 to 4 times per week</b>                     | 6 (6.1)      | 2 (5)       | 1 (25)    | 0         | 3 (5.7)              |
| <b>5 to 6 times per week</b>                     | 1 (1)        | 0           | 0         | 0         | 1 (1.9)              |
| <b>1 time per day</b>                            | 6 (6.1)      | 2 (5)       | 1 (25)    | 0         | 3 (5.7)              |
| <b>2 or more times per day</b>                   | 4 (4.1)      | 3 (7.5)     | 0         | 0         | 1 (1.9)              |
| <b>Use of well/spring water, N (%)</b>           | 207 (41.9)   | 81 (39.1)   | 8 (36.4)  | 1 (33.3)  | 117 (47.2)           |
| <b>Duration of well/spring water use, N (%)</b>  |              |             |           |           |                      |
| <b>Less than 1 year</b>                          | 9 (4.3)      | 2 (2.5)     | 0         | 0         | 7 (6)                |
| <b>1 to 5 years</b>                              | 27 (13)      | 8 (9.9)     | 2 (25)    | 0         | 17 (14.5)            |
| <b>5 to 10 years</b>                             | 39 (18.8)    | 14 (17.3)   | 1 (12.5)  | 1 (100)   | 23 (19.7)            |
| <b>Greater than 10 years</b>                     | 132 (63.8)   | 57 (70.4)   | 5 (62.5)  | 0         | 70 (59.8)            |
| <b>Current smoker, N (%)</b>                     | 20 (4.1)     | 7 (3.3)     | 1 (4.5)   | 0         | 12 (4.7)             |
| <b>Pack/years, mean ± SD</b>                     | 11.3 ± 11.7  | 9.1 ± 7.0   | 15 ± NA   | -         | 12.1 ± 14.2          |
| <b>Smoking duration, N (%)</b>                   |              |             |           |           |                      |
| <b>Less than 1 year</b>                          | 3 (15)       | 0           | 0         | -         | 3 (25)               |
| <b>2 to 5 years</b>                              | 1 (5)        | 0           | 0         | -         | 1 (8.3)              |
| <b>5 to 10 years</b>                             | 1 (5)        | 1 (14.3)    | 0         | -         | 0                    |
| <b>10 to 30 years</b>                            | 5 (25)       | 0           | 1 (100)   | -         | 4 (33.3)             |
| <b>Greater than 30 years</b>                     | 10 (50)      | 6 (85.7)    | 0         | -         | 4 (33.3)             |
| <b>Former smoker, N (%)</b>                      | 189 (40)     | 80 (39)     | 3 (14.3)  | 1 (33.3)  | 105 (43)             |
| <b>Pack/years, mean ± SD</b>                     | 12.9 ± 14.4  | 10.1 ± 11.0 | 7.3 ± 6.9 | 22.5 ± NA | 15.1 ± 16.5          |
| <b>Past smoking duration, N (%)</b>              |              |             |           |           |                      |
| <b>Less than 1 year</b>                          | 12 (6.3)     | 6 (7.5)     | 0         | 0         | 6 (5.7)              |
| <b>1 to 2 years</b>                              | 11 (5.8)     | 7 (8.8)     | 0         | 0         | 4 (3.8)              |
| <b>2 to 5 years</b>                              | 23 (12.2)    | 13 (16.2)   | 0         | 0         | 10 (9.5)             |
| <b>5 to 10 years</b>                             | 40 (21.2)    | 18 (22.5)   | 1 (33.3)  | 0         | 21 (20)              |
| <b>10 to 30 years</b>                            | 72 (38.1)    | 26 (32.5)   | 2 (66.7)  | 0         | 44 (41.9)            |
| <b>Greater than 30 years</b>                     | 31 (16.4)    | 10 (12.5)   | 0         | 1 (100)   | 20 (19)              |

**e-Table 4.** Environmental exposures in all USPHSR subjects (male and female) by WHO Group 1, includes alcohol, marijuana, and recreational drug use

| Exposure                                                         | All Patients | IPAH      | FPAH      | PVOD/PCH  | APAH (all-subgroups) |
|------------------------------------------------------------------|--------------|-----------|-----------|-----------|----------------------|
| <b>Patients, N</b>                                               | 494          | 213       | 22        | 3         | 256                  |
| <b>Alcohol consumption, past 1 year, N (%)</b>                   |              |           |           |           |                      |
| <b>Daily</b>                                                     | 23 (4.7)     | 10 (4.7)  | 0         | 0         | 13 (5.1)             |
| <b>5 to 6 times per week</b>                                     | 12 (2.4)     | 6 (2.8)   | 0         | 0         | 6 (2.4)              |
| <b>3 to 4 times per week</b>                                     | 15 (3)       | 10 (4.7)  | 1 (4.5)   | 0         | 4 (1.6)              |
| <b>2 times per week</b>                                          | 19 (3.9)     | 8 (3.8)   | 0         | 0         | 11 (4.3)             |
| <b>1 time per week</b>                                           | 27 (5.5)     | 13 (6.1)  | 2 (9.1)   | 0         | 12 (4.7)             |
| <b>2 to 3 times per month</b>                                    | 42 (8.5)     | 16 (7.5)  | 2 (9.1)   | 0         | 24 (9.4)             |
| <b>Once a month</b>                                              | 30 (6.1)     | 12 (5.7)  | 1 (4.5)   | 0         | 17 (6.7)             |
| <b>3 to 11 times per year</b>                                    | 61 (12.4)    | 23 (10.8) | 7 (31.8)  | 2 (66.7)  | 29 (11.4)            |
| <b>1 to 2 times per year</b>                                     | 93 (18.9)    | 43 (20.3) | 4 (18.2)  | 1 (33.3)  | 45 (17.6)            |
| <b>Not in past 1 year</b>                                        | 124 (25.2)   | 49 (23.1) | 3 (13.6)  | 0         | 72 (28.2)            |
| <b>Never</b>                                                     | 46 (9.3)     | 22 (10.4) | 2 (9.1)   | 0         | 22 (8.6)             |
| <b>Average daily drink consumption in past 1 year, mean ± SD</b> | 1.8 ± 1.5    | 1.8 ± 1.2 | 1.8 ± 1.2 | 1.8 ± 1.4 | 1.9 ± 1.7            |
| <b>Binge drinking<sup>a</sup> in last 1 year, N (%)</b>          | 85 (17.2)    | 40 (18.8) | 5 (22.7)  | 0         | 40 (15.6)            |
| <b>Current drug use, N (%)</b>                                   | 24 (4.9)     | 7 (3.3)   | 1 (4.5)   | 0         | 16 (6.2)             |
| <b>Type of drug used, N (%)</b>                                  |              |           |           |           |                      |
| <b>Amphetamine</b>                                               | 2 (0.4)      | 0         | 0         | -         | 2 (0.8)              |
| <b>Dextroamphetamine</b>                                         | 0            | 0         | 0         | -         | 0                    |
| <b>Cocaine</b>                                                   | 0            | 0         | 0         | -         | 0                    |
| <b>PCP</b>                                                       | 0            | 0         | 0         | -         | 0                    |
| <b>Marijuana</b>                                                 | 20 (4)       | 7 (3.3)   | 1 (4.8)   | -         | 12 (4.7)             |
| <b>Other<sup>b</sup></b>                                         | 3 (0.6)      | 1 (0.5)   | 0         | -         | 2 (0.8)              |
| <b>Past drug use, N (%)</b>                                      | 130 (26.7)   | 53 (25.2) | 8 (36.4)  | 1 (33.3)  | 68 (27)              |
| <b>Type of drug used, N (%)</b>                                  |              |           |           |           |                      |
| <b>Amphetamine</b>                                               | 19 (3.8)     | 5 (2.3)   | 1 (4.5)   | 0         | 13 (5.1)             |
| <b>Methamphetamine</b>                                           | 22 (4.5)     | 6 (2.8)   | 1 (4.5)   | 0         | 15 (5.9)             |
| <b>Dextroamphetamine</b>                                         | 2 (0.4)      | 0         | 0         | 0         | 2 (0.8)              |
| <b>Cocaine</b>                                                   | 37 (7.5)     | 16 (7.5)  | 1 (4.5)   | 0         | 20 (7.8)             |
| <b>PCP</b>                                                       | 4 (0.8)      | 1 (0.5)   | 0         | 0         | 3 (1.2)              |
| <b>Marijuana</b>                                                 | 117 (23.7)   | 51 (23.9) | 7 (31.8)  | 1 (33.3)  | 58 (22.7)            |
| <b>Other<sup>b</sup></b>                                         | 14 (2.8)     | 4 (1.9)   | 0         | 0         | 10 (3.9)             |

<sup>a</sup>Binge drinking is defined as > 5 drinks for males or > 4 drinks for females in 2 hours

<sup>b</sup>Other drugs include ADHD medication, LSD, acid, mushrooms, crack, ecstasy, heroin, mescaline, opium, peyote, and Quaaludes

**e-Table 5.** Right heart catheterization data at diagnosis for HPAH patients, grouped by the most commonly identified genetic mutations.<sup>b</sup>

| Right Heart Catheterization Data        | All patients (499) | HPAH <sup>a</sup> (76) | ABCC8 (5)   | ACVRL1 (5)  | BMPR2 (39)  | GDF2 (5)   | GGCX (3)    | TBX4 (3)   |
|-----------------------------------------|--------------------|------------------------|-------------|-------------|-------------|------------|-------------|------------|
| MAP, mmHg                               | 93.2 ± 17.4        | 89.6 ± 14.7            | 93 ± NA     | 93.3 ± 18.8 | 88.3 ± 16.5 | -          | -           | 89 ± NA    |
| N                                       | 241                | 35                     | 1           | 3           | 21          | 0          | 0           | 1          |
| Mean PAP, mmHg                          | 49.4 ± 13.2        | 53.4 ± 12.0            | 50.6 ± 16.0 | 53.4 ± 5.7  | 58.0 ± 10.7 | 49.0 ± 3.7 | 67.0 ± 10.5 | 55.0 ± 9.8 |
| N                                       | 498                | 76                     | 5           | 5           | 39          | 5          | 3           | 3          |
| PCWP, mmHg                              | 10.2 ± 3.8         | 9.0 ± 4.1              | 10.6 ± 5.2  | 10.0 ± 6.0  | 9.2 ± 3.4   | 7.6 ± 2.3  | 11.0 ± 4.0  | 11.0 ± 6.2 |
| N                                       | 487                | 75                     | 5           | 5           | 38          | 5          | 3           | 3          |
| Mean RAP, mmHg                          | 9.3 ± 5.6          | 9.5 ± 4.7              | 9.0 ± 4.1   | 11.0 ± 5.4  | 8.7 ± 3.9   | 9.5 ± 4.4  | 19 ± NA     | 9.7 ± 7.6  |
| N                                       | 489                | 71                     | 5           | 5           | 36          | 5          | 1           | 3          |
| PVR, Wood units                         | 10.4 ± 5.8         | 12.1 ± 5.8             | 11.8 ± 6.8  | 14.4 ± 10.3 | 14.3 ± 5.4  | 10.1 ± 4.6 | 17.4 ± 9.2  | 9.6 ± 2.4  |
| N                                       | 479                | 74                     | 5           | 5           | 38          | 5          | 3           | 3          |
| Thermodilution CO, L/min                | 4.5 ± 1.6          | 4.5 ± 1.1              | 4.4 ± 0.6   | 3.8 ± 0.8   | 4.5 ± 1.2   | 3.6 ± 1.3  | 4.55 ± 2.2  | 4.4 ± 0.1  |
| N                                       | 291                | 35                     | 2           | 2           | 17          | 4          | 2           | 2          |
| Thermodilution CI, L/min/m <sup>2</sup> | 2.4 ± 0.7          | 2.4 ± 0.6              | 2.6 ± 0.4   | 2.1 ± 0.6   | 2.5 ± 0.7   | 1.8 ± 0.5  | 2.9 ± NA    | 2.6 ± 0.5  |
| N                                       | 222                | 29                     | 2           | 2           | 17          | 3          | 1           | 2          |
| Fick CO, L/min                          | 4.3 ± 1.6          | 4.2 ± 1.4              | 3.9 ± 1.3   | 4.4 ± 3.0   | 3.8 ± 1.2   | 5.0 ± 1.8  | 2.6 ± NA    | 4.7 ± 0.6  |
| N                                       | 398                | 64                     | 5           | 4           | 33          | 3          | 1           | 3          |
| Fick CI, L/min/m <sup>2</sup>           | 2.3 ± 0.7          | 2.2 ± 0.6              | 2.0 ± 0.4   | 2.0 ± 1.3   | 2.1 ± 0.6   | 1.9 ± 0.2  | -           | 2.6 ± 0.7  |
| N                                       | 316                | 56                     | 5           | 4           | 32          | 2          | 0           | 3          |
| SvO <sub>2</sub> , %                    | 64.0 ± 9.8         | 63.5 ± 8.9             | 55.0 ± 17.0 | 65.0 ± 7.6  | 63.4 ± 8.6  | 66.5 ± 7.8 | 41 ± NA     | 71.0 ± 4.2 |
| N                                       | 289                | 47                     | 2           | 4           | 27          | 2          | 1           | 2          |

All values mean +/- SD unless otherwise indicated

Please see previous tables for abbreviations

HPAH – Heritable

<sup>a</sup>HPAH includes all those with pathogenic/suspected pathogenic mutations and individuals previously classified as FPAH without identified mutations

<sup>b</sup>Less common mutations (only found in 1-2 patients) including *ATP13A3*, *BMPR1B*, *EIF2AK4*, *ENG*, *KCNA5*, *KLK1*, *SMAD1*, and *SOX17* are not included
